# Supplementary material for: Ce–Zr–La/Al2O3 prepared in a continuous stirred-tank reactor: a highly thermostable support for an efficient Rh-based three-way catalyst
Source: Royal Society of Chemistry journal article supplement (doi:10.1039/c5dt02917a), 2015-01-01
Supplement: c5dt02917a1.pdf [file c5dt02917a1.pdf]

## Supplementary Information

for

### **Ce-Zr-La/Al<sub>2</sub>O<sub>3</sub> Prepared in Continuous Stirred -tank Reactor: A Highly Thermostable Support for Efficient Rh- based Three-way catalyst**

*Su-Ning Wang<sup>a</sup>, Li Lan<sup>b</sup>, Wei-Bo Hua<sup>a</sup>, Zhong-Hua Shi<sup>b,c</sup>, Yao-Qiang Chen<sup>a,b,c,\*</sup>, Mao-Chu Gong<sup>b,c</sup>, Lin Zhong<sup>a,\*</sup>*

<sup>a</sup> *College of Chemical Engineering, Sichuan University, Chengdu, Sichuan 610064, China.*

<sup>b</sup> *Key Laboratory of Green Chemistry & Technology, Ministry of Education, College of Chemistry, Sichuan University, Chengdu, Sichuan 610064, China.*

<sup>c</sup> *Center of Engineering of Environmental Catalytic Material, Chengdu, Sichuan 610064, China.*

*\*Corresponding author. Email: [nic7501@scu.edu.cn](mailto:nic7501@scu.edu.cn) (Prof. Dr. Yao-Qiang Chen)*

*[zhonglin@scu.edu.cn](mailto:zhonglin@scu.edu.cn) (Dr. Lin Zhong)*

## **This Supplementary Information includes:**

Table S1. Proportions of the pore diameter within a certain range for fresh and aged samples.

Table S2. Lattice parameter and crystallite size detected by XRD.

Table S3. Light-off temperatures ( $T_{50\%}$ ) of NO, CO and C<sub>3</sub>H<sub>8</sub> over catalysts.

Figure S1. SEM images of the fresh samples (a) and (b) CZLA-C-800, (c) and (d) CZLA-B-800, and aged samples (e) CZLA-C-1000, (f) CZLA-B-1000.

Figure S2. The elemental distributions and chemical composition of CZLA-C-800.

Figure S3. H<sub>2</sub>-TPR profiles of the (a) fresh and aged support materials and (b) fresh and aged catalysts.

Figure S4. Rh dispersions of the fresh and aged catalysts.

Figure S5. Rh 3d XPS spectra of the fresh and aged catalysts.

Table S1. Proportions of the pore diameter within a certain range for fresh and aged samples.

| Sample      | $P_{<2}$ nm (%) | $P_{2-10}$ nm (%) | $P_{10-16}$ nm (%) | $P_{16-24}$ nm (%) | $P_{24-32}$ nm (%) |
|-------------|-----------------|-------------------|--------------------|--------------------|--------------------|
| CZLA-C-800  | 0.50            | 44.37             | 26.23              | 21.52              | 7.38               |
| CZLA-B-800  | 2.16            | 48.68             | 26.52              | 14.49              | 8.15               |
| CZLA-C-1000 | 0.49            | 32.61             | 26.64              | 29.65              | 10.61              |
| CZLA-B-1000 | 1.33            | 25.61             | 35.06              | 26.62              | 11.38              |

Table S2. Lattice parameter and crystallite size detected by XRD.

| Sample                                                          | Lattice parameter |         | Crystallite size (Å) |
|-----------------------------------------------------------------|-------------------|---------|----------------------|
|                                                                 | $a$ (Å)           | $c$ (Å) |                      |
| Standard (Zr <sub>0.85</sub> Ce <sub>0.15</sub> )O <sub>2</sub> | 3.632             | 5.229   | –                    |
| CZLA-C-800                                                      | 3.627             | 5.260   | 55                   |
| CZLA-B-800                                                      | 3.626             | 5.257   | 57                   |
| CZLA-C-1000                                                     | 3.636             | 5.234   | 72                   |
| CZLA-B-1000                                                     | 3.638             | 5.231   | 82                   |

Table S3. Light-off temperatures ( $T_{50\%}$ ) of NO, CO and C<sub>3</sub>H<sub>8</sub> over catalysts.

| Catalyst    | NO              | CO              | C <sub>3</sub> H <sub>8</sub> |
|-------------|-----------------|-----------------|-------------------------------|
|             | $T_{50\%}$ (°C) | $T_{50\%}$ (°C) | $T_{50\%}$ (°C)               |
| Rh/CZLA-C-f | 172             | 169             | 270                           |
| Rh/CZLA-B-f | 178             | 173             | 280                           |
| Rh/CZLA-C-a | 209             | 207             | 410                           |
| Rh/CZLA-B-a | 231             | 230             | –                             |

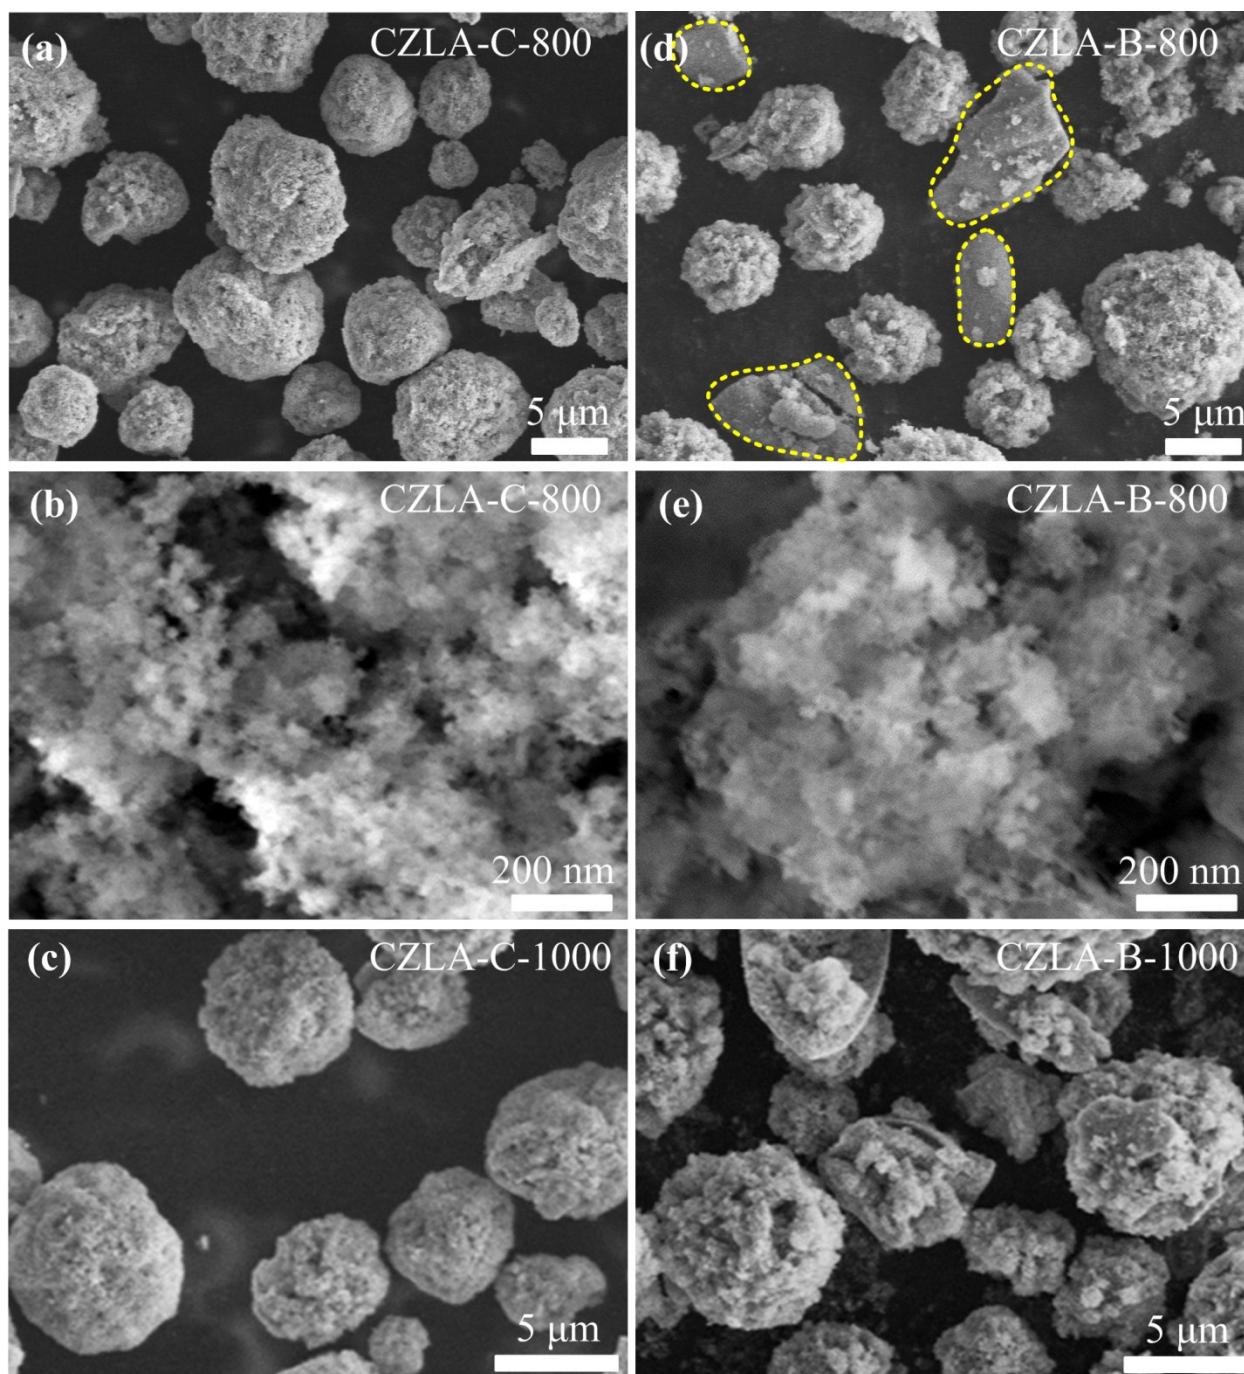

Figure S1. SEM images of the fresh samples (a) and (b) CZLA-C-800, (d) and (e) CZLA-B-800, and aged samples (c) CZLA-C-1000, (f) CZLA-B-1000.

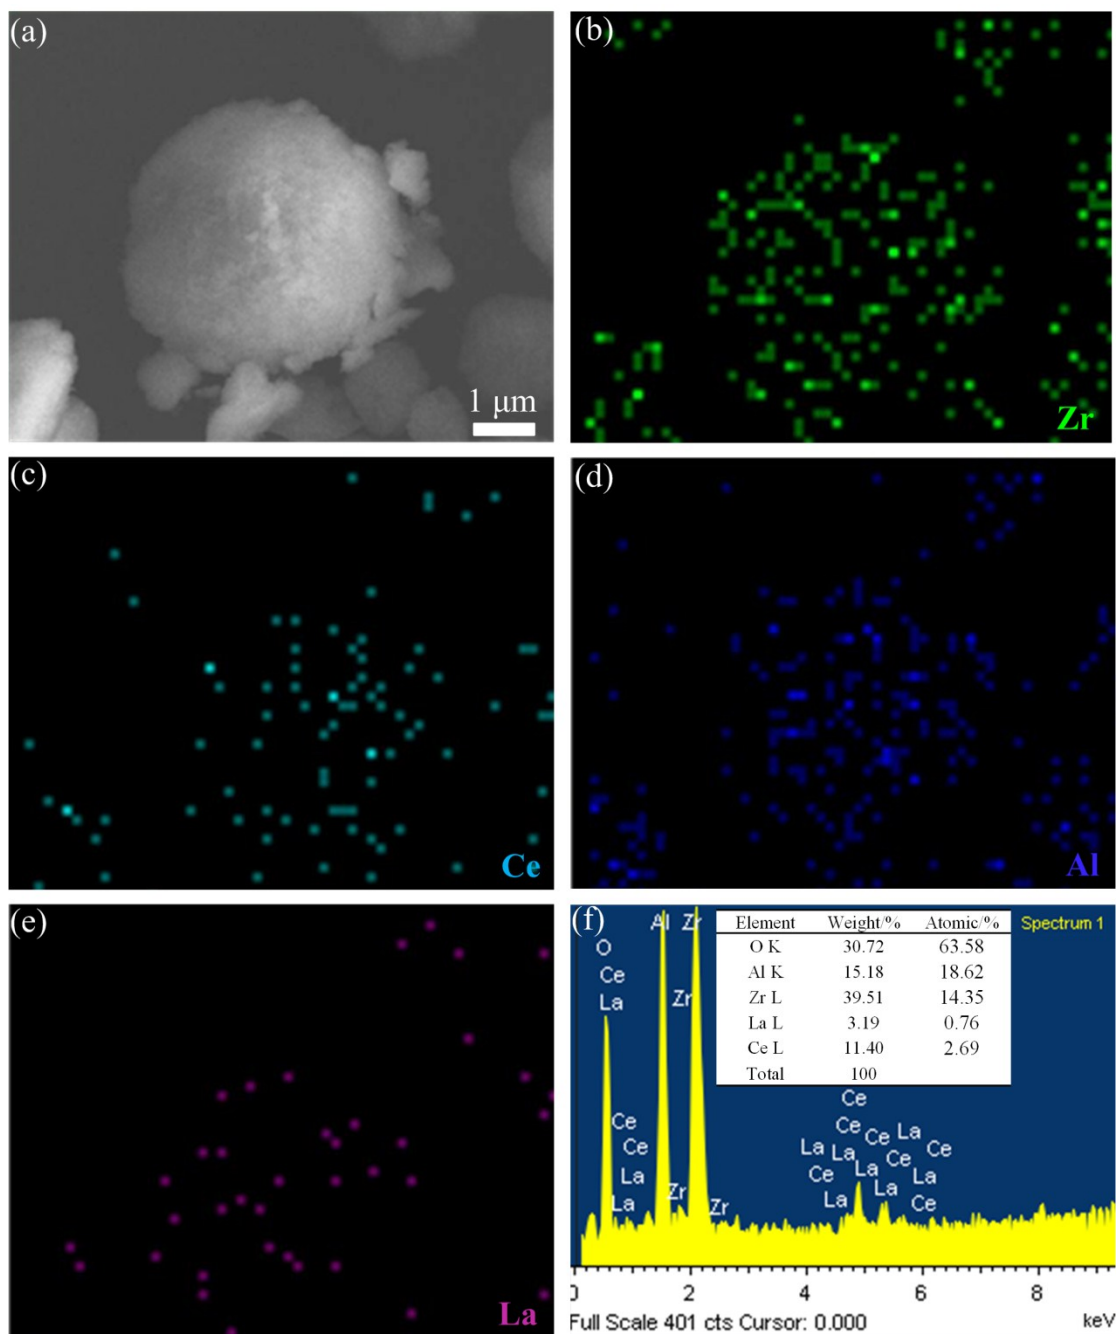

Figure S2. The elemental distributions and chemical composition of CZLA-C-800.

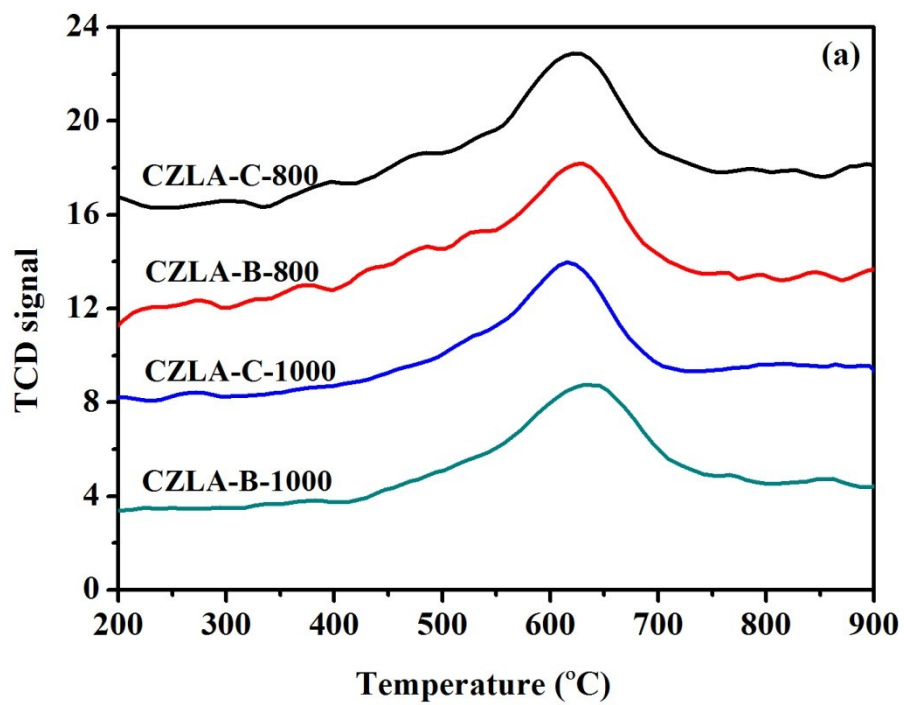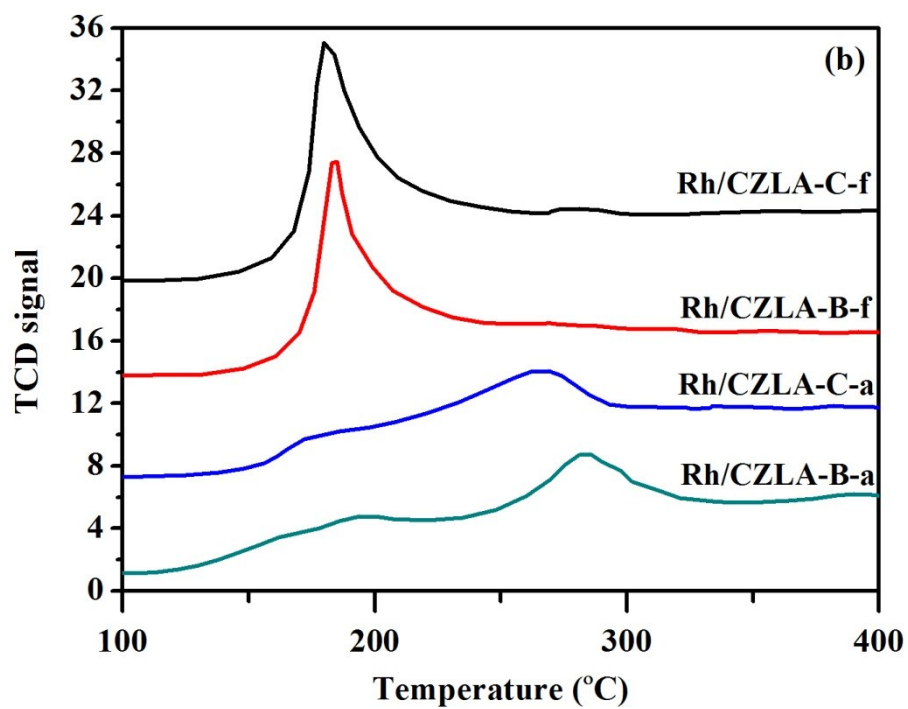

Figure S3. H<sub>2</sub>-TPR profiles of the (a) fresh and aged support materials and (b) fresh and aged catalysts.



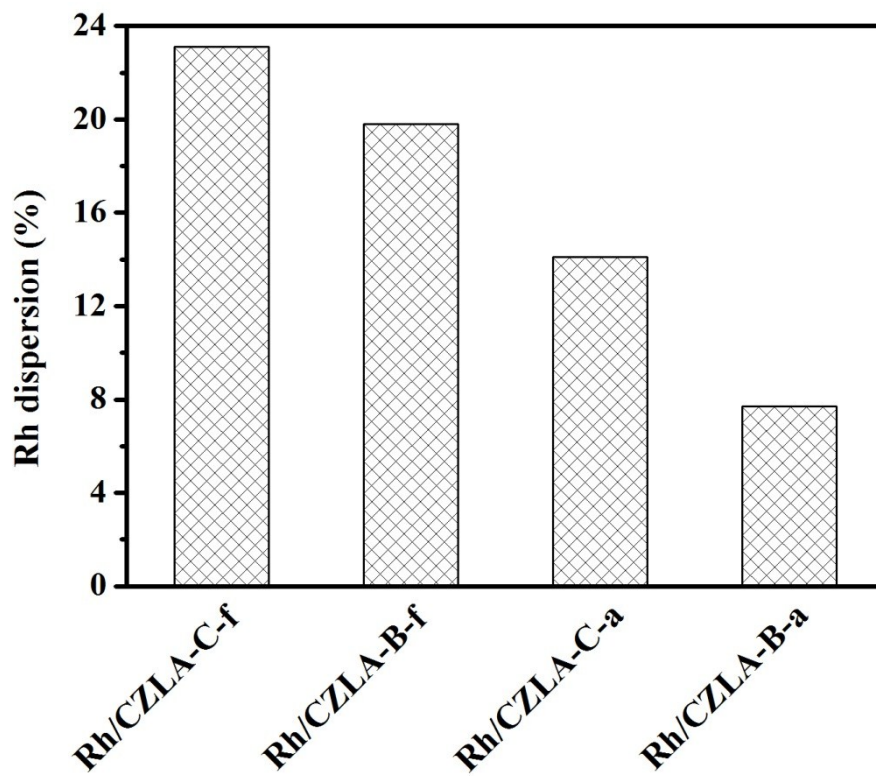

Figure S4. Rh dispersions of the fresh and aged catalysts.

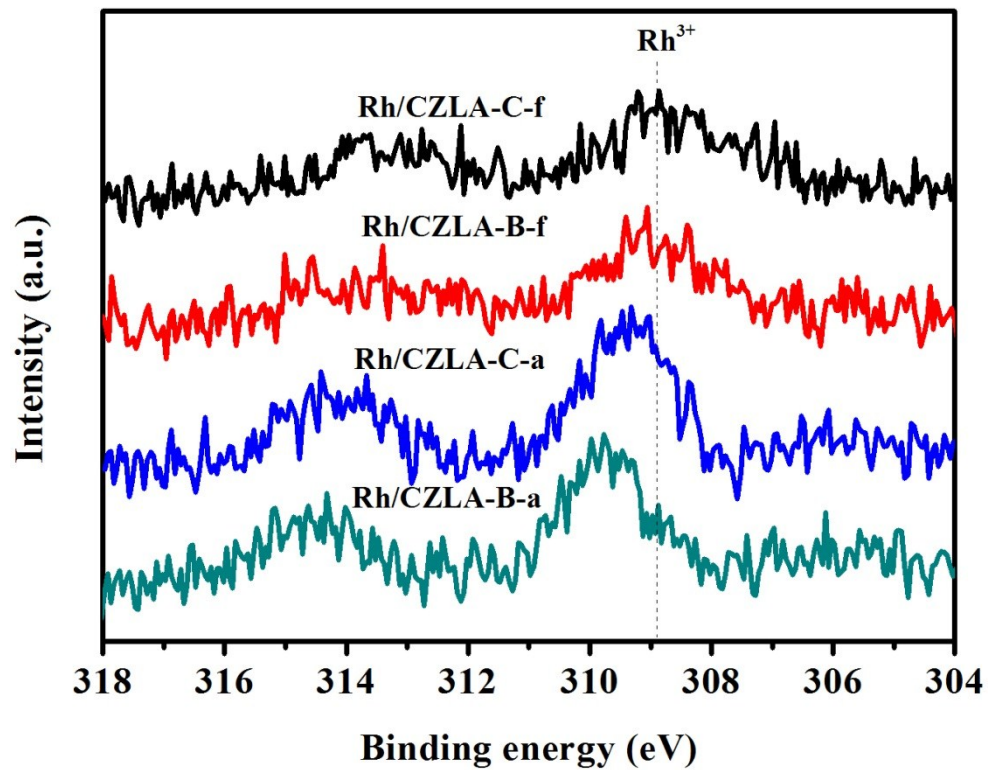

Figure S5. Rh 3d XPS spectra of the fresh and aged catalysts.
